1 **Title: Impact of *Salmonella* genome rearrangement on gene expression**

2

3 **Authors and Affiliations**

4 Emma V. Waters<sup>1</sup>, Liam A. Tucker<sup>1</sup>, Jana K. Ahmed<sup>2</sup>, John Wain<sup>1,3</sup>, Gemma C. Langridge<sup>1\*</sup>

5

6 \* Corresponding author. E-mail [gemma.langridge@quadram.ac.uk](mailto:gemma.langridge@quadram.ac.uk); Telephone +44 (0)1603 255378

7

8 1 Microbes in the Food Chain, Quadram Institute Bioscience, Norwich Research Park, Norwich NR4

9 7UQ, United Kingdom;

10 2 The Wellcome Trust Sanger Institute, Wellcome Trust Genome Campus, Hinxton, Cambridge CB10

11 1SA, United Kingdom;

12 3 Norwich Medical School, University of East Anglia, Norwich Research Park, Norwich NR4 7TJ,

13 United Kingdom

14 **Running Title:** Long-read sequencing determines GS, RNA shows impact of GS

15

16 **Key Words:** 48-plex Long-Read Sequencing; Genome Structure; RNAseq

17

18

19

20

21

22

23

24

## 25 **Abstract**

26 In addition to nucleotide variation, many bacteria also undergo changes at a much larger scale via  
27 rearrangement of their genome structure around long repeat sequences. These rearrangements  
28 result in genome fragments shifting position and/or orientation in the genome without necessarily  
29 affecting the underlying nucleotide sequence. To date, scalable techniques have not been applied to  
30 genome structure (GS) identification, so it remains unclear how extensive this variation is and the  
31 extent of its impact upon gene expression. However, the emergence of multiplexed, long-read  
32 sequencing overcomes the scale problem, as reads of several thousand bases are routinely produced  
33 that can span long repeat sequences to identify the flanking chromosomal DNA, allowing GS  
34 identification. Genome rearrangements were generated in *Salmonella enterica* serovar Typhi  
35 through long-term culture at ambient temperature. Colonies with rearrangements were identified  
36 via long-range PCR and subjected to long-read nanopore sequencing to confirm genome variation.  
37 Four rearrangements were investigated for differential gene expression using transcriptomics.  
38 All isolates with changes in genome arrangement relative to the parent strain were accompanied by  
39 changes in gene expression. Rearrangements with similar fragment movements demonstrated  
40 similar changes in gene expression. The most extreme rearrangement caused a large imbalance  
41 between the origin and terminus of replication and was associated with differential gene expression  
42 as a factor of distance moved towards or away from the origin of replication. Genome structure  
43 variation may provide a mechanism through which bacteria can quickly adapt to new environments  
44 and warrants routine assessment alongside traditional nucleotide level measures of variation.

45

46

47

48

49

50

## 51 **Introduction**

52 Small nucleotide-level variations in bacterial genomes, such as single-nucleotide polymorphisms  
53 (SNPs), or small insertions and deletions (indels) can have huge effects, from altering antibiotic  
54 resistance to switching entire metabolic pathways on or off. Bacteria can also undergo changes at a  
55 much larger scale via chromosomal rearrangements, where large genome fragments shift position  
56 and orientation in the genome to ultimately produce different unique genome structures (GSs)  
57 without affecting the underlying nucleotide sequence. These large structural variations occur via  
58 homologous recombination around long repeat sequences, including transposases (Achaz et al.  
59 2002), duplicated genes (Nakagawa et al. 2003), prophages (Brüssow et al. 2004; Fitzgerald et al.  
60 2021), insertion sequence (IS) elements (Darling et al. 2008; Weigand et al. 2019, 2017; Lee et al.  
61 2016) and ribosomal operons (Liu and Sanderson 1998; Page et al. 2020). Independent to the repeat  
62 sequence used as anchor points, large chromosomal rearrangements have been associated with  
63 speciation, diversification, outbreaks, immune evasion and host/environmental adaptation in  
64 bacteria (Hughes 2000; Fitzgerald et al. 2021; Brüssow et al. 2004). Such variation could offer several  
65 advantages for the survival of bacteria: it may rapidly provide varying phenotypes to enhance  
66 adaptability between different niches, it is reversible, and can alter expression patterns of many  
67 genes (Hughes 2000). Unlike other types of repeat sequences, ribosomal operons are present in all  
68 bacterial genomes and therefore genomic rearrangement is a mode of variation possible in all  
69 bacteria with two or more ribosomal operons (Page et al. 2020).

70

71 Short-read whole genome sequencing (SRS), alongside the ability to multiplex samples, has provided  
72 the necessary resolution and high-throughput required to regularly identify SNPs and other small  
73 nucleotide changes in bacterial species important in human health. However, whilst highly accurate,  
74 SRS reads are only hundreds of base pairs long and are therefore unable to resolve long repeat  
75 sequences to produce a complete assembly or detect genomic rearrangement. Historically, the  
76 detection of GS variation has been challenging and performed on an ad hoc basis with lower

77 resolution methods such as long-range PCR or restriction enzyme digestion followed by pulsed-field  
78 gel electrophoresis (PFGE) (Liu and Sanderson 1996; Kothapalli et al. 2005; Matthews et al. 2011).

79

80 The emergence of long-read sequencing (LRS) technologies from Pacific Biosciences and Oxford  
81 Nanopore Technology (ONT) turns this situation around. LRS routinely produces reads of tens of  
82 thousands bases long, with potential to span across repeat sequences into the flanking DNA,  
83 producing complete assemblies that should ultimately allow the identification of GSs. The use of  
84 comparative genomic methods alongside visualisation programs has enabled multiple genomes to  
85 be aligned and compared which has helped highlight GS variation (Blom et al. 2016; Weigand et al.  
86 2019; Fitzgerald et al. 2021; Darling et al. 2010) but investigating this variation using such methods is  
87 challenging to perform at high-throughput due to compute power requirements.

88

89 With more complete bacterial genomes being deposited into public databases, we previously  
90 demonstrated the ability to routinely identify GS variation from complete assemblies by developing  
91 a software tool called *socru* (Page et al. 2020). With *socru* we reported that many bacterial species  
92 important in human health display a wide range of GSs. The role GS variation plays in diseases may  
93 be underappreciated due to the lack of high-throughput methods required to routinely assess this  
94 variation.

95

96 Here we present the first use of LRS (via MinION, ONT) to confirm GSs originally identified by long-  
97 range PCR and show multiplexed LRS can be used to routinely monitor and determine GSs in a high-  
98 throughput manner. Our model system was *Salmonella enterica* serovar Typhi (*S. Typhi*), the  
99 causative agent of typhoid fever, a pathogen in which GS variation has been repeatedly observed  
100 (Liu and Sanderson 1996; Kothapalli et al. 2005; Liu and Sanderson 1998). *S. Typhi* appears  
101 particularly capable of producing different GSs (Liu and Sanderson 1998; Matthews et al. 2011); with  
102 more GSs found in *S. Typhi* than in all other *S. enterica* combined (Page et al. 2020). 45 GSs have

103 been identified in *S. Typhi* via lab-based methods (Kothapalli et al. 2005; Matthews et al. 2011) and  
104 in 2019, we identified 17 GSs using *socru* from a total of 112 publicly available complete genomes  
105 (Page et al. 2020), 4 of which were novel. The ability to identify GSs in large numbers of bacterial  
106 genome sequences allows us to address the question of biological relevance of this, very common,  
107 form of bacterial variation.

108

109 Here we have used long-term *in vitro* culture of a laboratory strain to generate rearrangements,  
110 confirming these with long-range PCR and LRS. With these stable GS defined strains we investigated  
111 the impact of genome rearrangement on growth phenotype and gene expression.

112

## 113 **Results**

### 114 **Laboratory-generated genome structure variation**

115 After 4 months of long-term static culture at ambient temperature, different-sized individual  
116 colonies of the parent *S. Typhi* strain (WT) were observed, indicative of different growth phenotypes  
117 (Supplemental Fig. S1A). Both large and small colonies were picked at random for analysis.

118

### 119 **Genome structure by long-range PCR**

120 To determine GSs of *S. Typhi* colonies via long-range PCR, 14 forward and reverse primers were  
121 designed (Supplemental Table S1) to bind to regions 100-900 bp downstream of the *rrs* gene and  
122 upstream of the *rrf* gene of each of the seven *rrn* operons, respectively. These primers were used to  
123 perform 91 individual long-range PCRs to test all possible combinations of neighbouring fragments.  
124 Primer combinations which amplified across an entire *rrn* operon produced a ~6 kb band. The  
125 presence of seven different PCR products of correct sizes (~6 kb) confirmed WT derivatives had  
126 seven genomic fragments and allowed their GSs to be determined (Fig. 1, Table 1 and Supplemental  
127 Fig. S2). WT itself was derived from Ty2 (see Methods) and confirmed to have the same GS 2.66  
128 (17'35642') (genome accession GCF\_000007545.1.) (Deng et al. 2003).

129

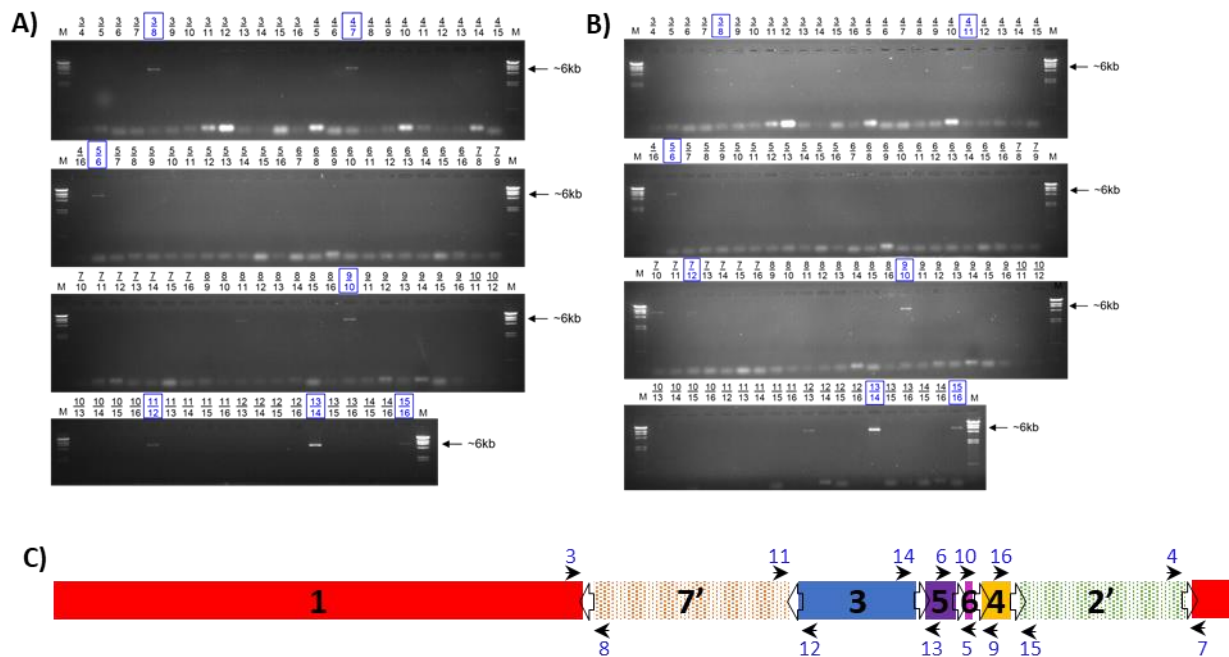

130

131 **Figure 1.** Long-range PCR for genome structure determination. Gel images of long-range PCR products of WT  
 132 derivatives 7 (A) and T (B). Primer combinations are given above every well. Combinations indicated in blue  
 133 boxes lead to the conclusion of the respective GS for that isolate. (C) Illustration of the primer binding sites  
 134 within the *Salmonella* genome (Ty2 (WT) GS2.66, 17'35642'). Open arrows indicate the *rrn* operons and their  
 135 orientation; black arrows indicate the direction and location of the primers numbered in blue; black numbers  
 136 denote genome fragments.

137

| Variant | Informative products                                  | Non-informative products | Genome arrangement                    |
|---------|-------------------------------------------------------|--------------------------|---------------------------------------|
| 7       | 3/8, 4/7, 5/6, 9/10, 11/12, 13/14, 15/16              | 3/5, 8/11*               | 17'35642' (GS2.66)                    |
| 8       | 3/8, 4/7, 5/6, 9/12, 10/11, 13/14, 15/16              | 6/13*, 8/11*             | 1'24'3567 (GS19.9)                    |
| U       | 3/8, 5/6, 11/14, 12/13, 15/16                         | 8/11*                    | 1'24'6'5'37 (GS2.57)                  |
| T       | 3/8, 4/11, 5/6, 7/10, 7/12, 9/10, 12/13, 13/14, 15/16 |                          | 135642'7 (GS21.3) and 1'6'5'35642'7** |

138 **Table 1.** Arrangements determined by long-range PCR. Primer combinations resulting in PCR products that  
 139 gave an informative 6 kb band were used to determine genome structures. Primer combination products were  
 140 deemed non-informative either due to spurious bands of incorrect size or representing circularised fragments.  
 141 \*8/11 = circularised fragment 6, 6/13 = circularised fragment 5; \*\*no GS assigned because the structure  
 142 includes duplicated fragments.

143

144 Long-range PCR of variant 7 produced eight amplified PCR products of the correct size (Fig. 1A). The  
 145 amplification of primer combination 8/11 represented the circularised fragment 6. The other seven  
 146 bands indicated which fragments neighboured each other and demonstrated that isolate 7  
 147 maintained the parental GS described by 17'35642' (GS 2.66, Fig. 2). Variant 8 produced nine  
 148 amplified PCR products of 6 kb in length (Supplemental Fig. S2A) representing 1'24'3567 (GS19.9),

149 where fragments 3, 5 and 6 had all undergone inversion in comparison to the parental GS (Fig. 2).  
 150 Variant U produced five amplified PCR products of 6 kb in length (Supplemental Fig. S2B). These  
 151 confirmed fragments 65'371' [=1'735'6] and fragments 24' were located together, respectively. Only  
 152 one valid orientation existed for these two fragment blocks in relation to each other, as ribosomal  
 153 operon direction must follow the direction of replication (Page et al. 2020). This gave the rearranged  
 154 structure 1'24'6'5'37 (GS2.57), where fragment 3 has an inverted orientation in comparison to the  
 155 parental GS (Fig. 2).  
 156

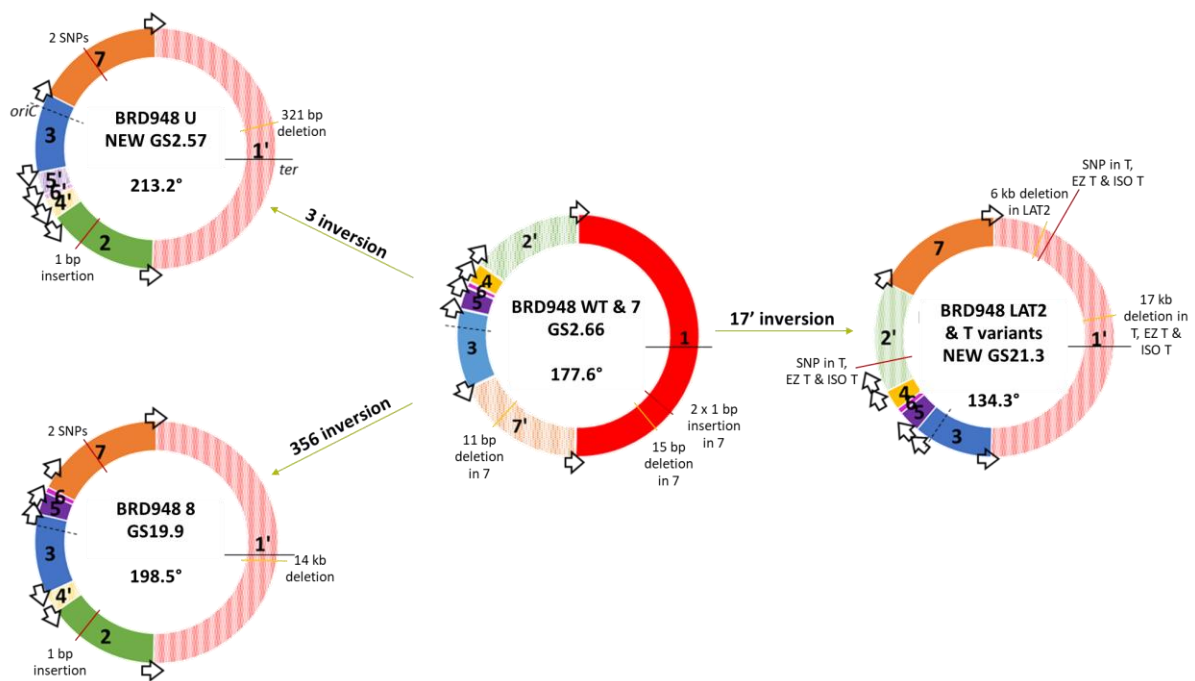

157  
 158 **Figure 2.** Genome rearrangements of variants relative to WT. Schematic showing variant genome structures  
 159 (GSs) and the rearrangement of WT fragments required to achieve these. GS fragments are labelled in respect  
 160 to the *Salmonella enterica* database reference LT2 (genome accession GCF\_000006945.2) and drawn  
 161 beginning with the largest fragment and working in a clockwise fashion around the chromosome. The  
 162 fragment containing origin of replication (here fragment 3) has its orientation fixed to match the orientation of  
 163 the database reference and therefore inversion of fragment 3 is depicted as the rest of the chromosome  
 164 inverted. Inverted fragment orientations are denoted prime (') with striped colours. *Ori-ter* balance is given in  
 165 degrees for each GS, going clockwise from *ter* to *oriC* as drawn. Arrows: ribosomal operons; *oriC* and dashed  
 166 lines: origin of replication; and *ter* and black whole lines: terminus of replication. Data from genome  
 167 sequencing used to identify insertions (red lines) and deletions (yellow lines) in each variant in comparison to  
 168 WT; bp, base pairs.  
 169

170 Long-range PCR of variant T produced nine amplified 6 kb PCR products (Fig. 1B). The informative  
 171 bands indicated variant T displayed a potentially mixed GS population, with genome structures of

172 both 135642'7 (GS21.3) and 1'6'5'35642'7 being present. These GSs both had fragments 1 and 7'  
 173 inverted relative to the parental GS (Fig. 2) and the latter had a duplication of fragments 5 and 6  
 174 within fragments 1 and 3.

175  
 176 These data confirmed the utility of long-range PCR in successfully identifying GS but also highlighted  
 177 drawbacks for scalability e.g. requirement for 91 individual long-range PCRs (plus additional controls)  
 178 to test all possible combinations of neighbouring fragments, and interpretation of the resulting gel  
 179 to take into account informative versus spurious or misleading bands

180

181 **Genome structure by long-read sequencing**

182 Following > 10 years of storage at -80 °C, we re-cultured the parent strain and 4 variants, and  
 183 performed LRS on these to determine if the GSs had remained stable and whether this method  
 184 recapitulated the same GS as those identified by long-range PCR. For the parent strain and variants  
 185 7, 8 and U, DNA extraction was performed from over-night cultures. For variant T, overnight culture  
 186 was repeatedly unsuccessful, and cells were instead harvested directly from an original glycerol  
 187 stock prior to high molecular weight DNA extraction. We determined that 2.5x10<sup>5</sup> cells/mL within  
 188 this glycerol stock were still viable (Supplemental Fig. S3). Due to the limited amount of glycerol  
 189 stock, trials at culturing this variant using alternative media (EZ-rich and iso-sensitest) were used to  
 190 successfully revive T and make fresh glycerol stocks, named EZ T and ISO T respectively. For EZ T and  
 191 ISO T, DNA extraction was performed accordingly from over-night cultures. All parent and variant  
 192 DNA was sequenced on the MinION platform (ONT); long-read sequence data are presented in Table  
 193 2.

194

| Sample | Raw reads   |                      |                       | Filtered reads |                      |                       |          | Assembly info     |                   |                  |
|--------|-------------|----------------------|-----------------------|----------------|----------------------|-----------------------|----------|-------------------|-------------------|------------------|
|        | Total reads | Read length N50 (bp) | Mean read length (bp) | Filtered reads | Read length N50 (bp) | Mean read length (bp) | Coverage | Number of contigs | Total length (Mb) | Genome Structure |
|        |             |                      |                       |                |                      |                       |          |                   |                   |                  |



|       |         |        |       |         |        |       |      |   |     |                                                          |
|-------|---------|--------|-------|---------|--------|-------|------|---|-----|----------------------------------------------------------|
| WT    | 93,987  | 15,251 | 8,019 | 78,814  | 15,435 | 9,352 | 154  | 1 | 4.8 | GS 2.66<br>(1'35642')                                    |
| 7     | 178,989 | 10,047 | 5,582 | 144,780 | 10,217 | 6,641 | 200  | 1 | 4.8 | GS 2.66<br>(1'35642')                                    |
| U     | 136,394 | 10,030 | 4,954 | 101,078 | 10,386 | 6,355 | 134  | 1 | 4.8 | GS2.57<br>(1'24'6'5'37)                                  |
| 8     | 361,660 | 8,161  | 4,968 | 303,526 | 8,290  | 5,686 | 360  | 1 | 4.8 | GS19.9<br>(1'24'3567)                                    |
| T     | 742,517 | 11,512 | 6,349 | 637,788 | 11,705 | 7,173 | 953  | 2 | 4.8 | GS21.3<br>(1'35642'7) and<br>1'6'5'35642'7**             |
| EZ T  | 229,085 | 16,020 | 8,228 | 193,979 | 16,212 | 9,512 | 383  | 4 | 4.8 | 1'6'5'35642'7 <sup>+</sup>                               |
| ISO T | 546,089 | 15,857 | 9,036 | 485,918 | 15,952 | 9,983 | 1011 | 1 | 4.8 | GS21.3<br>(1'35642'7) and<br>1'6'5'35642'7 <sup>++</sup> |
| LAT2  | 506,348 | 11,043 | 6,379 | 442,729 | 11,162 | 7,095 | 654  | 1 | 4.8 | GS21.3<br>(1'35642'7)                                    |

195 **Table 2.** Long-read information from the WT parent strain and 7 derivatives. Filtered reads have length greater  
 196 than 1 kb and min\_mean\_q of 50. Coverage based on length of Ty2 genome. \*\*fragments 5 and 6 assembled  
 197 on separate contig to rest of chromosome, mixed GS population; +fragments 5 and 6 assembled on individual  
 198 contigs, single GS population. ++all fragments assembled as single chromosomal contig, mixed GS population  
 199

200 Raw basecalled and demultiplexed fastq reads were filtered for high quality and for length greater  
 201 than 1 kb. In our dataset, assemblies of the expected genome size were generated for all isolates.  
 202 Genome structure assignments were determined from the assemblies using *socru* or *prokka* and  
 203 Artemis Comparison Tool. Two isolates, U and T, have novel GSs not yet documented in the  
 204 literature or public databases.

205

206 WT, 7, U and 8 each assembled into a single contig of ~4.8 Mb which gave identical GSs to those  
 207 determined by long-range PCR (Fig. 2, Table 2). In contrast, long-read assembly of T was in two  
 208 contigs: 4.6 Mb (fragments 1', 3, 4, 2' and 7) and 0.2Mb (fragments 6 and 5) with the latter having  
 209 twice the coverage of the former (Supplemental Fig. S4). A similar situation was seen with EZ T  
 210 where fragments 5 and 6 were present on two individual contigs but still at twice the coverage of  
 211 the main contig. To investigate the potential of a mixed GS population of 1'6'5'35642'7 and  
 212 1'35642'7 in these isolates, we searched the filtered reads for those which spanned fragments 3 and  
 213 5 and fragments 5' and 3 (Supplemental Material, Supplemental Fig. S5, Supplemental Table S2). For  
 214 T, the 3-5 bridge was present at approximately twice the presence of the 5'-3 bridge (208:111)

215 indicating the two different GSs were present in roughly equal proportions and potentially explains  
216 why the assembly software struggled to either generate a complete assembly or assemble the  
217 dominant structure. For EZ T, the two bridges were present in approximately equal amounts  
218 (87:100), indicating the presence of 1'6'5'35642'7 only and the loss of GS21.3 from the population,  
219 in comparison to the original variant T. Assembly of ISO T gave a single contig of ~4.8 Mb with a  
220 genome structure of 1'35642'7 (GS21.3). However, the two bridges were found in the filtered reads  
221 at a ratio of 2:1 (305:165), suggesting the presence of both GSs, as observed for T.

222

### 223 **Long-read sequencing as a method to monitor GS variation**

224 Having confirmed LRS provided the same GS as long-range PCR, we used long-term culture in  
225 different media to generate genome rearrangements. Twelve large and small colonies were picked  
226 at random and processed for multiplexed LRS on a single MinION flowcell.

227

228 Sequencing was performed for up to 5 days to achieve the maximum amount of data for highest  
229 coverage, before data was demultiplexed and processed through our GS identification pipeline.

230 Following LRS library preparation with the ONT rapid barcoding kit, assemblies of the expected  
231 genome size were generated for all tested colonies which had a mean read length of ~10 kb and  
232 minimum ~60x coverage. In one small, pin-prick colony (Supplemental Fig. S1B), LAT2, we observed  
233 genome rearrangement had occurred, producing a GS identical to isolate ISO T (1'35642'7, GS21.3)  
234 and was confirmed to contain only this GS via examination of filtered reads (Supplemental Table S2).

235 The remaining colonies tested had not undergone rearrangement and had the parental GS.

236

### 237 **Nucleotide-level variation**

238 Additional short-read whole genome sequencing was performed to generate hybrid assemblies for  
239 parent strain WT and variants 7, 8, U, T, EZ T, ISO T and LAT2. These gold-standard hybrid assemblies

240 were evaluated with CheckM, which confirmed they were  $\geq 99.66\%$  complete and contained  
 241  $\leq 0.4\%$  contamination. The only exception to this was the completeness of T which was 93.07 %.  
 242  
 243 As expected, GS analysis of the hybrid assemblies gave identical results to those previously identified  
 244 via long-read assemblies alone. Core genome SNP analysis of the variants confirmed that variants 7  
 245 and LAT2 were indistinguishable from the parent strain, WT. Isolates 8 and U were identical to each  
 246 other but had 2 SNPs different to WT, at 4,629,839 bp (G→T) and 4,637,875 bp (C→A) in the Ty2  
 247 reference genome. T, EZ T and ISO T were identical to each other but harboured 2 different SNPs  
 248 from WT: 677,285 bp (A→G) and 3,192,356 bp (C→T). All SNPs occurred in coding sequences,  
 249 causing non-synonymous changes (Table 3). cgSNPs at 3,192,356 and 4,637,875 bp generated  
 250 premature stop codons within the first and second domains of *toIC* and *treR* respectively. The SNP at  
 251 677,285 bp occurred in *rcsB* causing an amino acid located in the binding domain to change from a  
 252 hydrophobic phenylalanine to a polar serine. The SNP at 4,629,839 bp occurs in t4482 (*licR*) and  
 253 changes a negative charged aspartate to a large non-polar tyrosine.  
 254  
 255 Further comparative genomics with Breseq revealed additional nucleotide variation, particularly  
 256 associated with fragment 1 (Fig. 2, Table 3). Breseq was unable to detect the duplicated fragments 5  
 257 and 6 which are seen in T, EZ T and ISO T, as previously mentioned. Using the different levels of  
 258 variation seen in the isolates generated in this work, we have generated the most parsimonious  
 259 lineage (Supplemental Fig. S6).  
 260

| Sample | Type of nucleotide variation | Positions in Ty2 genome (bp) | Genes affected      | Fragments affected |
|--------|------------------------------|------------------------------|---------------------|--------------------|
| 7      | 1 bp insertion (C)           | 964,704                      | n/a                 | 1                  |
|        | 1 bp insertion (C)           | 964,743                      | n/a                 | 1                  |
|        | 11 bp deletion               | 4,507,390 – 4,507,400        | <i>tviA</i> (t4353) | 7                  |
|        | 15 bp deletion               | 821,258 – 821,272            | <i>baeR</i> (t0741) | 1                  |
| 8      | 1 SNP (G→T)                  | 4,629,839                    | t4482               | 7                  |
|        | 1 SNP (C→A)                  | 4,637,875                    | <i>treR</i> (t4490) | 7                  |
|        | 1 bp insertion (A)           | 3,191,594                    | <i>toIC</i> (t0310) | 2                  |

|                   |                    |                       |                                                                                                                                                                                                                            |   |
|-------------------|--------------------|-----------------------|----------------------------------------------------------------------------------------------------------------------------------------------------------------------------------------------------------------------------|---|
|                   | 14 kb deletion     | 1,523,024 – 1,537,156 | 12 genes completely deleted (t1474-1487) (including <i>hlyE</i> , <i>osmC</i> , <i>rpsV</i> , <i>sfcA</i> , <i>adhP</i> , <i>smvA</i> and <i>narU</i> ) and partial deletion of 2 genes (t1473 and <i>narZ</i> t1488)      | 1 |
|                   |                    |                       |                                                                                                                                                                                                                            |   |
| U                 | 1 SNP (G→T)        | 4,629,839             | t4482                                                                                                                                                                                                                      | 7 |
|                   | 1 SNP (C→A)        | 4,637,875             | <i>treR</i> (t4490)                                                                                                                                                                                                        | 7 |
|                   | 1 bp insertion (A) | 3,191,594             | <i>toIC</i> (t0310)                                                                                                                                                                                                        | 2 |
|                   | 321 bp deletion    | 1,313,723 – 1,314,043 | <i>lppB</i> (t1244)                                                                                                                                                                                                        | 1 |
|                   |                    |                       |                                                                                                                                                                                                                            |   |
| T, EZ T and ISO T | 1 SNP (A→G)        | 677,28                | <i>rscB</i> (t0595)                                                                                                                                                                                                        | 1 |
|                   | 1 SNP (C→T)        | 3,192,356             | <i>toIC</i> (t0310)                                                                                                                                                                                                        | 2 |
|                   | 17 kb deletion     | 1,313,228 – 1,330,361 | 12 genes completely deleted (t1244-1257) (including <i>ippB</i> , <i>ippA</i> , <i>pykF</i> , <i>ttrA</i> , <i>ttrC</i> , <i>ttrB</i> , <i>ttrS</i> , <i>ttrR</i> and <i>ydhZ</i> ) and partial deletion of 1 gene (t1258) | 1 |
|                   |                    |                       |                                                                                                                                                                                                                            |   |
| LAT2              | 6 kb deletion      | 598,923 – 605,161     | 4 genes completely deleted (t0527-0530) (including <i>ackA</i> ) and partial deletion of 2 genes (t0526 and t0531) (including <i>pta</i> (t0526))                                                                          | 1 |

261 **Table 3.** Nucleotide variation. SNPs, insertions and deletions identified in the 7 variants in comparison to the  
 262 WT parent.  
 263

### 264 **Impact of genome rearrangement on *ori-ter* balance**

265 All rearranged isolates generated by long-term growth showed additional nucleotide level variation  
 266 with all displaying indels and all but LAT2 having SNPs. In all cases, except isolate 7, the  
 267 rearrangement caused the *ori-ter* balance to become more imbalanced. All the indels, except the  
 268 smallest of 321 bp seen in U, occurred in the longer replicore which may represent some  
 269 mechanism of compensation towards restoring *ori-ter* balance (Fig. 2). However, deletions ranged in  
 270 size from 6-17 kb only resulted in shifting this balance by a maximum of 0.5°.

271

### 272 **Impact of genome rearrangement on growth rate**

273 Variants 7, 8 and U showed similar growth phenotypes and colony sizes to the parent strain (Fig. 3,  
 274 Supplemental Fig. S7). These growth phenotypes were consistent when repeated after 10 years in -  
 275 80 °C storage (Supplemental Fig. S7). From initial growth experiments, isolate T showed a clear  
 276 reduction in colony size (Supplemental Fig. S1A) and growth rate compared to the parent.

277 Subsequent growth experiments of revived T isolates and LAT2 showed similar reduction in colony  
278 size and growth rate (Fig. 3, Supplemental Fig. S1B).

279

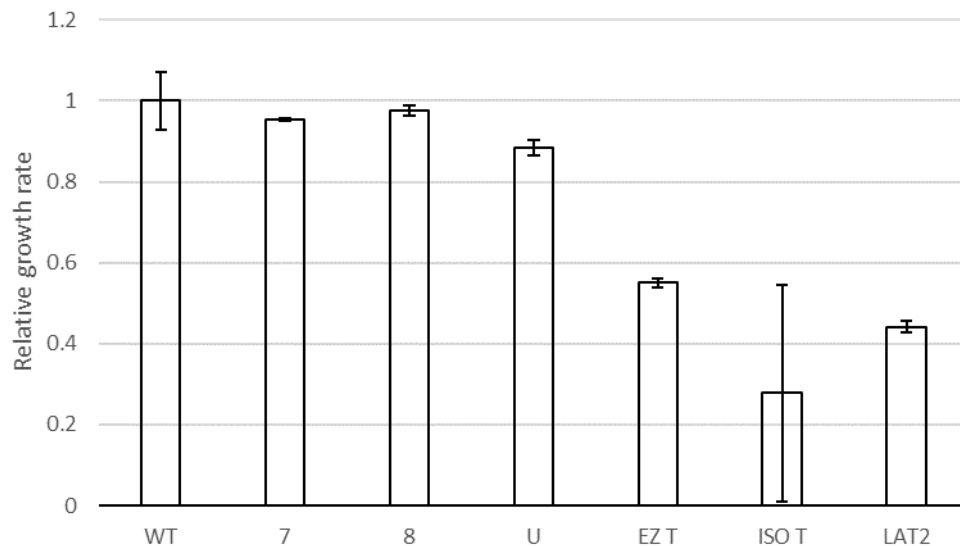

280

281 **Figure 3.** Growth rates of the 6 derivatives. Calculated for at least three independent biological replicates per  
282 isolate, relative to the WT parent strain. Error bars indicate standard deviation.

283

### 284 **Impact of genome rearrangement on gene expression**

285 The impact of rearrangement was explored using RNAseq to identify differentially expressed genes

286 (DEGs). As T, EZ T, ISO T and LAT2 all had the same GS, with or without duplicated fragments,

287 RNAseq was performed on WT parental strain and variants 7, 8, U and LAT2. Differential expression

288 was determined for each variant in comparison to the parent strain, which harbours 4431 genes

289 (Supplemental Table S3).

290

291 Isolate 7 (GS2.66) showed 63 significant DEGs (Supplemental Table S4). Only 13 genes were

292 upregulated in isolate 7, which included the superoxide dismutase *sodA*, an indicator of oxidative

293 stress also known to be positively regulated by BaeRS (Guerrero et al. 2013). This raises the

294 possibility that the 15 bp in-frame lesion detected in *baeR*, whilst appearing within a response

295 regulator receiver domain (Pfam: PF00072), may not have a functional impact on BaeR activity. The

296 *cyo* genes encoding for the cytochrome *bo* (ubiquinol oxidase) terminal complex were also

297 upregulated. Genes involved in Vi antigen (the capsular polysaccharide of *S. Typhi* which is a major  
298 virulence factor) and histidine biosynthesis were downregulated; the former may be partly due to  
299 the lesion detected within *tviA* which caused a frameshift mutation (Table 3).

300

301 For isolate 8 (GS19.9) and isolate U (GS2.57), 68 and 131 significant DEGs were identified  
302 respectively (Supplemental Table S4). Whilst representing different genome arrangements, they  
303 shared the same inversion of fragment 3, with the additional inversion of 5 and 6 in isolate 8 (Fig. 2).  
304 Not including the deletion of 14 genes in isolate 8, 83 % (45/54) of the significant DEGs in this isolate  
305 were also observed in isolate U. This included the upregulation of trehalose transport and utilisation  
306 (*treB*, *treC*) and of *ramA*, a transcriptional activator associated with multidrug resistance via AcrAB  
307 efflux (Nikaido et al. 2008), though no differential expression was observed for *acrAB* for either  
308 isolate. Tyrosine biosynthesis was downregulated in both (*tyrA*), as well as elements of  
309 glycolysis/gluconeogenesis (*pgk*, *eno*), with additional genes *pfkA*, *ppc* and *fba* downregulated in U.

310

311 By far the greatest impact upon expression was observed in LAT2, where 758 DEGs were identified  
312 (Supplemental Table S4). These were assessed in several ways: firstly, the genomic location of each  
313 significant DEG was plotted against the genome arrangement of both the parent (GS2.66) and LAT2  
314 (GS21.3) (Fig. 4). This indicated that for LAT2, genes on fragment 1 between the terminus and  
315 fragment 3 appeared generally upregulated, coinciding with their shift of ~ 800 kb towards the origin  
316 of replication. It also showed a general downregulation of genes on the other half of fragment 1  
317 (between the terminus and fragment 7) in alignment with their shift of ~ 800 kb away from the  
318 origin. Similarly, a general trend of downregulation was observed for fragment 7 genes, which had  
319 shifted ~600 kb away from the origin.

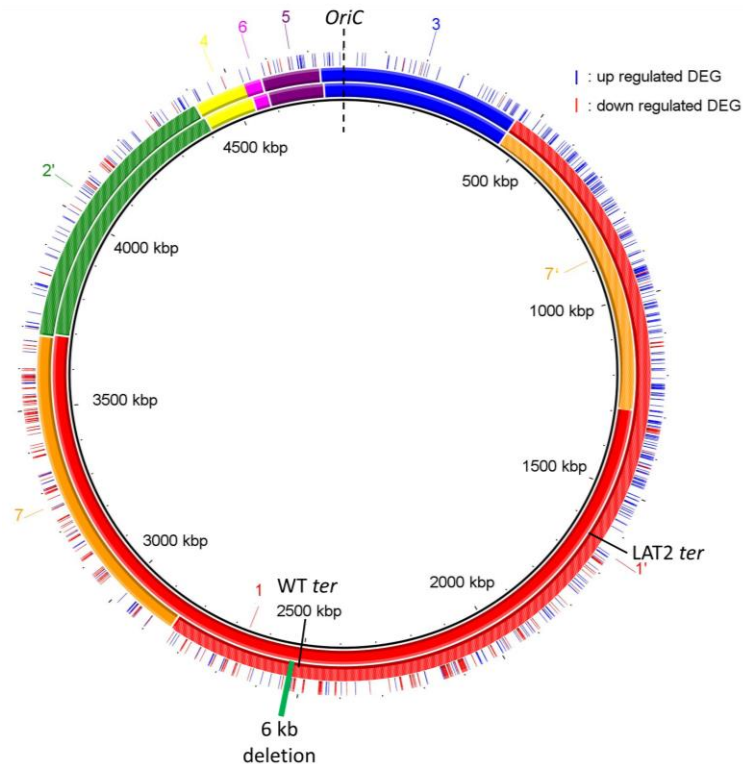

320 **Figure 4.** Gene expression in LAT2. BRIG representation of the WT genome (inner circle, GS 2.66 (17'35642'))  
321 and the LAT2 genome (middle circle, GS21.3 (1'35642'7)). Genome fragments are numbered and shown as  
322 coloured blocks, inverted fragments are coloured with stripes (e.g. green fragment 2) as per (Page et al. 2020).  
323 Same origin (*oriC*, dashed black line) and different termini (*ter*, solid black lines) of replication are shown for  
324 each genome. Outer circle shows location of up (blue line) and down (red line) regulated differentially  
325 expressed genes (DEG). Deletion event denoted in LAT2 by solid green rectangle.  
326

327 We therefore plotted genes per fragment by the distance they had shifted from the origin. This  
328 confirmed a large proportion of significant DEGs were found at the extreme ends of fragment 1 (Fig.  
329 5A), though no strong correlation between direction of regulation and distance shifted to/from  
330 origin was observed across the fragment ( $R^2 = 0.2836$ ). For fragment 7, 81 % (99/122) of significant  
331 DEGs were downregulated (Fig. 5B).

332

333 We also investigated which clusters of orthologous gene (COG) functions were present in the  
334 significant DEGs (Fig. 5C). All but one of the genes (34/35) affecting cell motility (COG category N)  
335 were downregulated in LAT2. Conversely, genes in categories D – cell cycle control, I – lipid transport  
336 and metabolism and J – translation and ribosomal structure were almost all upregulated.

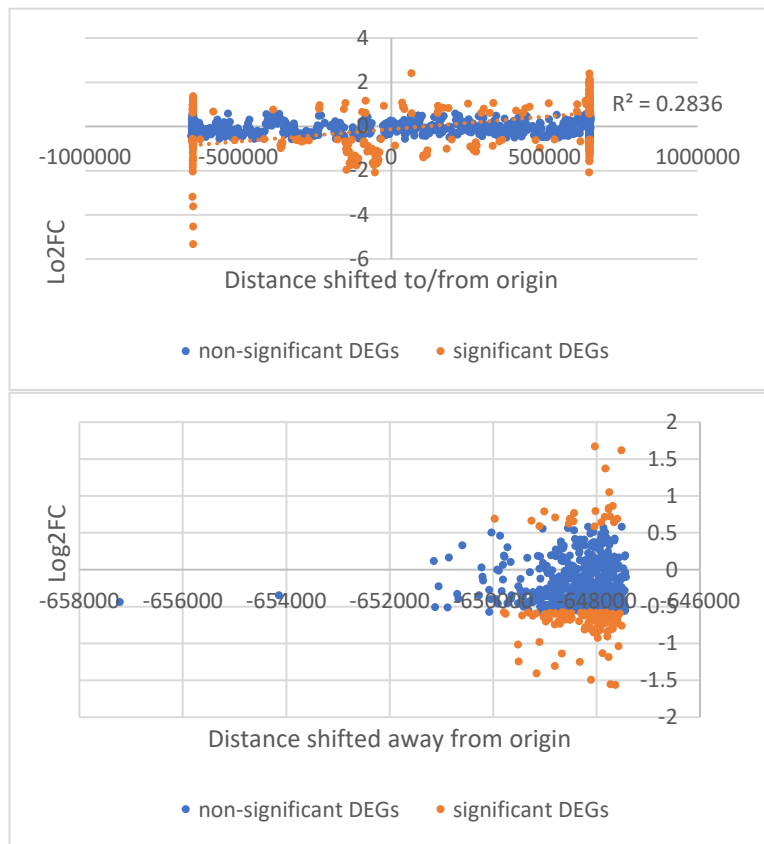

A

B

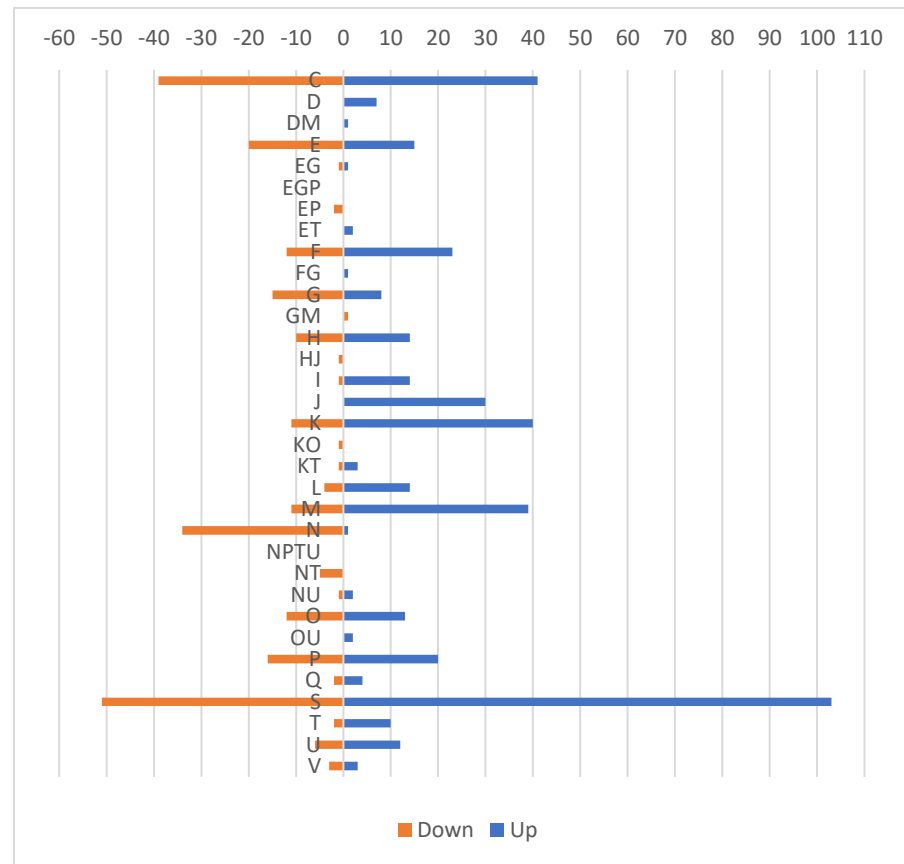

C

337 **Figure 5.** Impact of genome rearrangement on gene expression in LAT2. Graphical distribution of log<sub>2</sub>FC against distance a gene has moved towards or away from the  
 338 origin of replication for LAT2 genes on (A) fragment 1 and (B) fragment 7. Genes coloured by non (blue) and -significance (orange). Linear correlation in (A) shown as orange  
 339 dotted line. (C) Distribution of significant differentially expressed genes (DEGs) from LAT2 across COG categories. Down-regulated DEGs shown in orange, up-regulated in  
 340 blue. COG categories: C Energy production and conversion; D Cell cycle control, cell division, chromosome partitioning; E Amino acid transport and metabolism; F  
 341 Nucleotide transport and metabolism; G Carbohydrate transport and metabolism; H Coenzyme transport and metabolism; I Lipid transport and metabolism; J Translation,  
 342 ribosomal structure and biogenesis; K Transcription; L Replication, recombination and repair; M Cell wall/membrane/envelope biogenesis; N Cell motility; O  
 343 Posttranslational modification, protein turnover, chaperones; P Inorganic ion transport and metabolism; Q Secondary metabolites biosynthesis, transport and catabolism; S  
 344 Function unknown; T Signal transduction mechanisms; U Intracellular trafficking, secretion, and vesicular transport; V Defense mechanisms.



## 345 Discussion

346

347 We have demonstrated that long-read sequencing can be used for GS identification, with the added  
348 benefit over long-range PCR of scalability alongside all the genetic information that comes from  
349 whole genome sequencing. We have shown that genome rearrangement has an impact on gene  
350 expression and growth rate with the greatest impact being when the *ori-ter* balance is most  
351 disturbed.

352

353 Considering that there are 1440 possible *S. Typhi* GS structures, it is of interest that the GS21.3  
354 arrangement of T was recapitulated in an independent long-term growth experiment in isolate LAT2.  
355 This arrangement appears disadvantageous to bacterial growth due to the *ori-ter* balance being  
356 offset by  $\sim 45^\circ$  (Fig. 2), which was borne out in the growth rate analysis (Fig. 3). Theoretically, having  
357 fragments 1 and 3 next to each other in this arrangement of 1'35642'7 is the second most extreme  
358 *ori-ter* position that could be formed (the most extreme being where fragment 3 is also inverted:  
359 1'3'5642'7). Even though isolates T and LAT2 were generated in different growth media, there are  
360 other conditions in common, including limited nutrients, growth waste products and anaerobic  
361 conditions. As such, we speculate that reduced growth rates seen in rearrangements such as GS21.3  
362 may actually provide a selective advantage for survival in nutrient limited, or toxic, environments.

363

364 Given the growth effect of GS21.3, we investigated the impact that rearrangement had upon  
365 expression in all our GS arrangements. We observed that rearrangements with similar fragment  
366 movements demonstrated similar changes in gene expression. This was the case for isolates 8 and U  
367 which shared the inversion of fragment 3, and over 80 % of the DEGs in isolate 8 were also found in  
368 isolate U. In LAT2, GS21.3 caused a large imbalance between the origin and terminus of replication  
369 and was associated with differential gene expression as a factor of distance moved towards or away  
370 from the origin of replication, i.e. down regulation of most DEGs on fragment 7 and the greatest

371 number of up/down regulated DEGs being found at the extremes of fragment 1. Specific COG  
372 function analysis highlighted that the metabolically costly production of flagella for cell motility was  
373 down regulated in LAT2 (> 30 genes all located on fragment 1), highlighting that a change in genome  
374 arrangement could be providing a mechanism of adaptation to poor nutrient levels.

375

376 In addition to GS changes, DNA sequencing also revealed SNP variation and larger deletions of  
377 hundreds to thousands of base pairs. The SNPs observed all caused non-synonymous changes and  
378 mostly occurred in outer membrane proteins. In isolate T (and derivatives EZ T and ISO T), one SNP  
379 results in a premature stop codon in the middle of TolC (Guan et al. 2015), a key outer membrane  
380 component of several multidrug efflux pumps. The second SNP was in *rcsB*, a transcriptional  
381 regulator that responds to cell envelope stress (Wall et al. 2018) and positively regulates Vi antigen  
382 biosynthesis (Virlogeux et al. 1996), caused a non-synonymous change within the DNA binding  
383 domain (Casino et al. 2018). However, since neither of these SNPs were found in LAT2, their effect  
384 on expression in this unbalanced arrangement will be the subject of future investigation.

385

386 The two SNPs (t4482, a putative *licR*-type regulator and *treR*) and indel shared by isolates 8 and U,  
387 suggest a link between genomic and genetic events. The SNP in *treR* resulted in a premature stop  
388 codon between its two protein domains (Hars et al. 1998). TreR negatively regulates *treBC* - aligning  
389 with the de-repression of *treBC* in these variants which have been shown in *E. coli* to have a role in  
390 mitigating against low osmolarity, by increasing conversion of trehalose to glucose via trehalose-6-  
391 phosphate (Vanaporn and Titball 2020). The indel was earlier in the *tolC* sequence than the SNP in  
392 the T variants, sending the sequence out of frame after 10 amino acids, resulting in a premature stop  
393 codon after 43 aa. As all upstream sequence remained unchanged, this did not affect *tolC*  
394 expression. However, the loss of TolC function in three variants with GS changes, by independent  
395 lesions in at least two, suggests that the export capacities of its associated pumps can be deleterious  
396 under the low-nutrient conditions used here.

397

398 In all rearranged isolates (U, 8, T and LAT2), deletions relative to the parent strain were identified in  
399 fragment 1 (Fig. 2). Strikingly, the largest deletions (14 kb and 17 kb) were very close to the terminus  
400 of replication in 8 and T, respectively. In *Salmonella enterica*, Koskiniemi et al demonstrated that  
401 deletion rates are highest near the terminus of replication and may be a mechanism to increase  
402 fitness in the particular conditions under which deletion occurs (Koskiniemi et al. 2012). This raises  
403 the possibility that genome rearrangement is a mechanism to target deletions.

404

405 To support investigation of GSs, long-read technology is key, and it is continually evolving. At the  
406 beginning of our routine monitoring of GSs, only 12-plex kits for the MinION were available to  
407 perform this work in a higher throughput manner. In 2020, to coincide with rapid large scale Covid  
408 sequencing, ONT released a 96-plex ligation kit which was quickly taken on by the community to  
409 sequence 96 samples containing 1 kb amplicons at once (Tyson et al. 2020). This throughput can  
410 now be leveraged to sequence up to 96 bacterial genomes per flowcell (Arredondo-Alonso et al.  
411 2021), making routine GS identification the most accessible it's ever been.

412

## 413 **Conclusion**

414 In this study, we have identified 2 novel GSs, with one (GS21.3) being observed on two independent  
415 occasions. Through genomic and transcriptomic analysis, we have shown that the impact of  
416 rearrangement affects gene expression in similar ways across similar structural changes whilst the  
417 genome remains relatively balanced between the origin and terminus of replication, with more  
418 dramatic expression changes occurring in an unbalanced arrangement, accompanied by reduced  
419 growth rate. We also note that rearrangement appears to occur in conjunction with additional  
420 nucleotide variation, especially affecting gene presence near the terminus of replication.  
421 Incorporating routine identification of GS via long read sequencing will increase our understanding

422 of the frequency of this type of variation and provide a strong foundation to systematically assess  
423 the role of rearrangement in bacterial adaptation.

424

## 425 **Methods**

### 426 **Bacterial isolates included in this study**

427 The *S. Typhi* strain used in these studies is WT, a long-term culture derivative of WT26 pHCM1  
428 (Langridge et al. 2009). WT26 pHCM1 was originally derived from the attenuated Ty2-derived strain  
429 CVD908-*htrA*, which has deletion mutations in *aroC*, *aroD*, and *htrA* (Tacket et al. 1997), and further  
430 included a point mutation in *gyrA* and the multiple antibiotic resistance plasmid, pHCM1 (Turner et  
431 al. 2006). Long-term culture of WT26 lead to the loss of pHCM1 plasmid and the renaming of this  
432 strain to WT. Long-term, *in vitro* growth of WT in low salt LB (1 % tryptone, 0.5 % yeast, 0.5 % NaCl)  
433 generated 4 isolates (7, 8, U and T). After 10 years storage, isolate T was unable to be revived from  
434 glycerol stocks in original growth media and could only be revived using alternative media (EZ-rich  
435 (Teknova) and isosensitest (Oxoid)) which were used to make fresh glycerol stocks, named EZ T and  
436 ISO T respectively. Further long-term, *in vitro* growth of WT generated an isolate (LAT2) in  
437 isosensitest broth with a growth phenotype that deviated from that of the parent strain.

438

### 439 **Growth conditions for generation of different genome structures with long-term, *in vitro* growth**

440 Long-term cultures were used to induce *in vitro* genomic rearrangement in *S. Typhi* WT. Due to the  
441 nature of attenuation in this strain, WT requires media to be supplemented with aromatic amino  
442 acid mixture (aro-mix) of L-phenylalanine, L-tryptophan, and L-tyrosine at a final concentration of 40  
443  $\mu\text{g}/\text{mL}$  and 2, 3-dihydroxybenzoic acid and *p*-aminobenzoic acid at a final concentration of 10  $\mu\text{g}/\text{mL}$ .

444

445 Generation of variants 7, 8, U and T was achieved by growing a 50 mL aro-mix supplemented low salt  
446 LB culture of WT overnight at 37 °C, 180 rpm before leaving to grow at room temperature. After 4

447 months, 50  $\mu$ L was plated out on low salt LB agar (Supplemental Fig. S1A), supplemented with aro-  
448 mix, and incubated at 37 °C for 48 hrs; individual colonies were picked for long-range PCR.

449

450 Generation of variant LAT2 and the other colonies tested by MinION sequencing was carried out as  
451 above and also extended to include aro-mix supplemented iso-sensitest media. Aliquots were plated  
452 out at intervals between 1 and 11 months; LAT2 was identified after 8 months of growth in iso-  
453 sensitest (Supplemental Fig. S1B).

454

#### 455 **DNA extraction for long-range PCR**

456 DNA extraction of *WT* derivatives was carried out using the Wizard Genomic DNA Purification kit  
457 (Promega). In brief, 1 mL of overnight *S. Typhi* culture, was harvested. Cells were pre-lysed in 600  $\mu$ L  
458 of Nuclei Lysis Solution and incubated at 80 °C for 10 min. 3  $\mu$ L of RNase A was added to the lysed  
459 cells and incubated for a further 15 min at 37 °C. 220  $\mu$ L Protein Precipitation Solution was added to  
460 the lysed cells before being incubated on ice for 15 min. The precipitated protein was separated  
461 from the nucleic acids by centrifuged at 13.2 rpm for 15 min. 650  $\mu$ L of the supernatant was mixed  
462 with 650  $\mu$ L isopropanol before being centrifuged at 13.2 rpm for 15 min. The supernatant was  
463 discarded and the pellet was washed with 1 mL of 70 % ethanol, before being centrifuged at 13.2  
464 rpm for 15 min. The supernatant was discarded and the pellet was left to dry. The dried pellet was  
465 resuspended in 45  $\mu$ L of DNA rehydration solution.

466

#### 467 **Long-range PCR for identification of genome structures**

468 The primer sequences and combinations for detecting specific *rrn* (Supplemental Table S1) were  
469 designed using the program Primer3 Input 0.4.0 (<http://frodo.wi.mit.edu/>) and were synthesised by  
470 Sigma-Aldrich. All primers were aligned to the whole genome sequence of CT18 (Parkhill et al.  
471 2001) to ensure specificity and no other matches with more than 80 % similarity were found. To  
472 ensure consideration of all options, every possible primer combination was used in 91 separate PCR

473 reactions. PCRs were performed on 1  $\mu$ L of DNA with 2X Fidelity Taq PCR Master Mix (USB), 0.7  $\mu$ M  
474 forward primer and 0.7  $\mu$ M reverse primer in a total volume of 12.5  $\mu$ L. The PCR conditions were:  
475 pre-incubation at 95  $^{\circ}$ C for 30 sec, amplification for 27 cycles at 95  $^{\circ}$ C for 25 sec, 59  $^{\circ}$ C for 1 min and  
476 68  $^{\circ}$ C for 7 min, with a final extension at 68  $^{\circ}$ C for 7 min. Resulting *rrn* PCR products were separated  
477 out on 1 % agarose gels, before being detected using ethidium bromide staining (3 mg/mL).

478

#### 479 **DNA extraction for sequencing**

480 DNA extraction of *S. Typhi* isolates was carried out using a modified protocol of the PuriSpin Fire  
481 Monkey kit (RevoluGen). In brief, 1 mL of overnight *S. Typhi* culture, was harvested. Cells were  
482 pre-lysed in 100  $\mu$ L of 3 mg/mL lysozyme, 1.2 % Triton X-100, and incubated at 37  $^{\circ}$ C, 180 rpm for  
483 10 min. 300  $\mu$ L lysis solution (LSDNA, RevoluGen) and 20  $\mu$ L of 20 mg/mL Proteinase K (Qiagen) was  
484 added to the partly-lysed cells and incubated at 56  $^{\circ}$ C for 20 min. 10  $\mu$ L of 20  $\mu$ g/ $\mu$ L RNase A (Sigma)  
485 was added to the lysed cells and incubated for a further 10 min at 37  $^{\circ}$ C. 350  $\mu$ L binding solution (BS,  
486 RevoluGen) and 400  $\mu$ L 75 % isopropanol was added to the lysed cells before they were transferred  
487 to the spin column. Bound DNA was washed as per manufacturer's instructions before being eluted  
488 in 2x100  $\mu$ L of elution buffer (EB, RevoluGen) that had been pre-warmed at 65  $^{\circ}$ C. DNA  
489 concentration was determined using the broad range dsDNA assay kit (Thermo Fisher) on a Qubit 3.0  
490 Fluorometer (Thermo Fisher). The quality of high-molecular weight DNA were assessed using the  
491 TapeStation 2200 (Agilent Technologies) automated electrophoresis platform with Genomic  
492 ScreenTape (Agilent Technologies) and a DNA ladder (200 to >60,000 bp, Agilent Technologies).

493

#### 494 **Long-read sequencing**

495 MinION libraries, containing 6/12 DNA samples, were prepared using the Rapid Barcoding Kit  
496 (SQK-RBK004, ONT) as per the manufacturer's protocol. A pre-concentration step of 0.6x AMPure XP  
497 beads (Beckman Coulter) was performed on DNA samples which did not meet the manufacturer's  
498 DNA input recommendations (400 ng in 7.5  $\mu$ L). The library was loaded onto the flow cell according

499 to the manufacturer's instructions. Sequencing was performed on the MinION platform using R9.4  
500 flow cells (FLO-MIN106, ONT) with a run time of up to 120 hrs. ONT MinKNOW software v1.4 was  
501 used to collect raw sequencing data and ONT Guppy v2.3.7 was used for local base-calling of the raw  
502 data after sequencing runs were completed. Python qcats command was used to de-multiplex  
503 samples.

504

### 505 **Short-read sequencing**

506 Genomic DNA was normalised to 0.5 ng/ $\mu$ L with EB (10 mM Tris-HCl). 0.9  $\mu$ L of TD Tagment DNA  
507 Buffer (Illumina Catalogue No. 15027866) was mixed with 0.09  $\mu$ L TDE1, Tagment DNA Enzyme  
508 (Illumina Catalogue No. 15027865) and 2.01  $\mu$ L PCR grade water in a master mix and 3  $\mu$ L added to a  
509 chilled 96 well plate. 2  $\mu$ L of normalised DNA (1 ng total) was pipette mixed with the 3  $\mu$ L of the  
510 tagmentation mix and heated to 55  $^{\circ}$ C for 10 min in a PCR block. A PCR master mix was made up  
511 using 4  $\mu$ L kapa2G buffer, 0.4  $\mu$ L dNTPs, 0.08  $\mu$ L Polymerase and 6.52  $\mu$ L PCR grade water, contained  
512 in the Kap2G Robust PCR kit (Sigma Catalogue No. KK5005) per sample and 11  $\mu$ L added to each well  
513 need to be used in a 96-well plate. 2  $\mu$ L of each P7 and P5 of Nextera XT Index Kit v2 index primers  
514 (Illumina Catalogue No. FC-131-2001 to 2004) were added to each well. Finally, the 5  $\mu$ L of  
515 Tagmentation mix was added and mixed. The PCR was run with 72  $^{\circ}$ C for 3 min, 95  $^{\circ}$ C for 1 min, 14  
516 cycles of 95  $^{\circ}$ C for 10 s, 55  $^{\circ}$ C for 20 s and 72  $^{\circ}$ C for 3 min. Following the PCR reaction the libraries  
517 were quantified using the Quant-iT dsDNA Assay Kit, high sensitivity kit (Catalogue No. 10164582)  
518 and run on a FLUOstar Optima plate reader. Libraries were pooled following quantification in equal  
519 quantities. The final pool was double-SPRI size selected between 0.5 and 0.7X bead volumes using  
520 KAPA Pure Beads (Roche Catalogue No. 07983298001). The final pool was quantified on a Qubit 3.0  
521 instrument and run on a High Sensitivity D1000 ScreenTape (Agilent Catalogue No. 5067-5579) using  
522 the Agilent Taestation 4200 to calculate the final library pool molarity.

523

524 The pool was run at a final concentration of 1.8 pM on an Illumina Nextseq500 instrument using a  
525 Mid Output Flowcell (NSQ® 500 Mid Output KT v2(300 CYS) Illumina Catalogue FC-404-2003)  
526 following the Illumina recommended denaturation and loading recommendations which included a 1  
527 % PhiX spike in (PhiX Control v3 Illumina Catalogue FC-110-3001). Data was uploaded to Basespace  
528 ([www.basespace.illumina.com](http://www.basespace.illumina.com)) where the raw data was converted to 2 FASTQ files for each sample.

529

### 530 **Long-read and hybrid assemblies bioinformatics workflow**

531 Bioinformatic analysis was performed on the open platform Galaxy. Prior to assembly, two steps  
532 were included to trim nanopore data. Filtrlong v0.2.0 (<https://github.com/rrwick/Filtrlong>) was used  
533 to trim nanopore data and only keep reads over 1 kb with a minimum mean quality score of 50.  
534 Porechop v0.2.3 (<https://github.com/rrwick/Porechop>) was used to remove sequencing adapters in  
535 the middle or the ends of each read. The long-read sequence correction and assembly tool Flye v2.5  
536 (Kolmogorov et al. 2019) was used to assemble reads into contigs using an estimated genome size of  
537 5 Mb. This long-read assembly was then polished with two rounds of Racon v1.3.1.1 (Vaser et al.  
538 2017) and one round of Medaka v0.11.5 (ONT) using trimmed long-read data and corresponding  
539 overlapped reads generated by Minimap2 v2.12 (Li 2018). Hybrid assemblies were then generated  
540 by further polishing the final long-read assembly with two rounds of Pilon v1.20.1 (Walker et al.  
541 2014) using short-read data and corresponding overlapped reads generated by Minimap2 v2.12 (Li  
542 2018). Assemblies were evaluated for completeness and contamination with CheckM v1.0.11 (Parks  
543 et al. 2015).

544

545 GSs of isolates were then identified using two methods. Automatic identification of genome  
546 structure was performed by *socru* v2.2.2 (Page et al. 2020). Manual determination of genome order  
547 and fragment orientation was performed using Artemis Comparison Tool v18.0.2 (Carver et al. 2008)  
548 after annotation of the *rrn* operons with Prokka v1.14.5 (Seemann 2014). Within both methods,  
549 assembled genomic reads were aligned to the reference genome of *S. Typhimurium* LT2 which acted



550 as a baseline for genome order and fragment orientation.

551

### 552 **Nucleotide variation analysis**

553 Short-read data for WT and variants were analysed using the program breseq v0.24.0+2 (Deatherage  
554 and Barrick 2014), which outputs a list of probable mutations of various types and the sequence  
555 evidence for them. All analysis were run in consensus mode against the Ty2 reference sequence  
556 (RefSeq accession number NC\_004631.1). Nucleotide variations which were common to WT and all  
557 variants, including deletions associated with the attenuation of WT strain, were not included in any  
558 further analysis. SNPs were checked using Snippy and Snippy-core v4.4.3  
559 (<https://github.com/tseemann/snippy>). Large deletions (greater than 10 bp) were checked in  
560 Artemis Comparison Tool v18.0.2 (Carver et al. 2008).

561

### 562 **Original growth curve analysis of WT derivatives**

563 Growth curves were generated by growing strains in triplicate in isosensitest broth at 37 °C with  
564 agitation. Overnight cultures were used to inoculate 200 µL isosensitest broth to an OD<sub>600</sub> of ~0.1  
565 before OD readings were taken every 10 min over 11 hrs with a Fluostar Optima Microplate Reader  
566 (BMG Labtech).

567

### 568 **Repeated growth curve analysis of WT derivatives**

569 Growth curves were generated by growing strains in triplicate in no salt LB broth at 37 °C with  
570 agitation. Overnight cultures were then standardised to an OD<sub>600</sub> of ~0.6, before a further 100X  
571 dilution was made. OD readings were taken every 15 min for 100 µL prepared cultures over 11 hrs  
572 with a Bioscreen C plate reader (Growth Curves Ltd). The growth rate was graphically determined by  
573 fitting a straight line on the exponential phase of the growth curve and calculating its slope.

574

### 575 **RNA extraction**

576 RNA extraction of *S. Typhi* isolates was carried out, in triplicate for each isolate, using the All Prep  
577 DNA/RNA Mini extraction kit (Qiagen) following manufactures protocol. In brief, 100  $\mu$ L of overnight  
578 culture was used to inoculate 10 mL EZ-media before being incubated at 37 °C, 180 rpm until an OD  
579 of  $\sim$ 0.35-0.40 was reached ( $\sim$ 4 hrs). Cells were harvested by centrifugation at 4,000 g for 10 min and  
580 then resuspended in 100  $\mu$ L RNeasy RNA stabilization reagent (Thermo Fisher). 600  $\mu$ L buffer RLT  
581 Plus was added to the cell suspension before being pipetted mixed and transferred to an AllPrep  
582 RNA spin column. One volume (700  $\mu$ L) of 70% ethanol was added to the flow-through before being  
583 pipette mixed and transferred to an AllPrep RNeasy spin. Bound RNA was washed as per  
584 manufacturer's instructions before being eluted in 2x30  $\mu$ L of RNase-free water. RNA concentration  
585 was determined using the high sensitivity RNA assay kit (Thermo Fisher) on a Qubit 3.0 Fluorometer  
586 (Thermo Fisher). The quality of RNA were assessed using the TapeStation 2200 (Agilent  
587 Technologies) automated electrophoresis platform with RNA ScreenTape (Agilent Technologies) and  
588 a DNA ladder (50 to >6,000 bp, Agilent Technologies).

589

#### 590 **RNaseq library preparation**

591 From total RNA, the ribosomal RNA was depleted with the RiboCop rRNA Depletion Kit for Bacteria  
592 (Lexogen) using the Gram-negative (G-) probe mix according to the manufacturer's protocol. RNaseq  
593 library preparation was carried out using a modified protocol of the QIAseq Stranded mRNA Select  
594 kit (Qiagen), which in brief used a fifth of the RNA input and reagents. The quality of RNaseq library  
595 were assessed using the TapeStation 2200 (Agilent Technologies) automated electrophoresis  
596 platform with D5000 ScreenTape (Agilent Technologies) and a DNA ladder (100 to 5,000 bp, Agilent  
597 Technologies). RNaseq librabries were sequenced on the Nextseq500 (Illumina) using a Mid Output  
598 Flowcell with the aim of obtaining 10 million reads per replicate ( $\sim$ X2000 gene coverage). Data was  
599 uploaded to Basespace ([www. basespace.illumina.com](http://www.basespace.illumina.com)) where the raw data was converted to 2  
600 FASTQ files for each sample.

601

## 602 **Differentially expressed gene analysis**

603 Bioinformatic analysis was performed on the open platform Galaxy v19.05. The quality of raw  
604 sequences was ascertained using FastQC v0.72 (<https://github.com/s-andrews/FastQC>) before being  
605 quality control trimmed using fastp v0.19.5 (Chen et al. 2018). HISAT2 v2.1.0 (Kim et al. 2015) was  
606 used to align reads to the Ty2 reference sequence (RefSeq accession number NC\_004631.1).  
607 Assignment of aligned reads to the genes of Ty2 was measured using featureCounts v1.6.3 (Liao et  
608 al. 2014) before DESeq2 v2.11.40.4 (Love et al. 2014), which is designed for the use with biological  
609 replicates, was used to determine differentially expressed genes from the count tables. The  
610 corrected p-value (p-adj), which is adjusted for multiple testing and controls the false discovery rate,  
611 was used to screen the DEGs.  $p\text{-adj} \leq 0.05$  was set as the threshold to judge significance of  
612 differential gene expression. After identifying significant DEGs, these were further screened using  
613 the absolute log<sub>2</sub> fold change which was set to  $|\text{Log}_2\text{FCI}| \geq 0.58$ , which is equivalent to  $|\text{FCI}| \geq 1.5$ , to  
614 judge the magnitude of the expression change.

615

616 Brig v0.95 (Alikhan et al. 2011) was used as a way to visualise the significant DEGs on a global scale  
617 using the parent WT genome, cut at dnaA to allow dnaA to be the beginning of the genome, as the  
618 backbone reference genome. The fragments of the parent and variate GSs were plotted as the first  
619 and second rings respectively to indicate the fragments involved in the genome rearrangement.

620

## 621 **PMA<sub>xx</sub> real-time PCR bacterial viability test**

622 A PMA<sub>xx</sub> Real-Time PCR Bacterial Viability Test (Biotium Inc.), designed for selective detection of  
623 viable *S. enterica* cells in the presence of dead bacteria, was used to determine if any of the cells  
624 within a glycerol stock of isolate T were viable even though it was no longer culturable. See  
625 supplementary material.

626

## 627 **Data Access**

628 The Illumina and nanopore genome sequence data, RNA-seq data and hybrid assemblies generated  
629 in this study are available in DDBJ/ENA/GenBank databases under the Project accession number  
630 PRJEB52538 and per sample as: ERS11885537 (WT), ERS11885538 (7), ERS11885539 (8),  
631 ERS11885540 (U), ERS11885541 (T), ERS11885542 (ISO T), ERS11885543 (EZ T) and ERS11885544  
632 (LAT2).

633

### 634 **Competing Interest Statement**

635 GCL has previously consulted for RevoluGen Ltd on bioinformatic analyses. Fire Monkey DNA  
636 extraction kits were provided free of charge by RevoluGen in this project.

637

### 638 **Acknowledgments**

639 The authors would like to thank Dave Baker and the QIB sequencing facility for support in Illumina  
640 DNA and RNA sequencing, Gemma Kay for advice in MinION setup and Satheesh Nair and Keith  
641 Turner for useful discussions on long range PCR.

642

643 EVW, JW and GCL gratefully acknowledge the support of the Biotechnology and Biological Sciences  
644 Research Council (BBSRC); this research was funded by the BBSRC Institute Strategic Programme  
645 Microbes in the Food Chain BB/R012504/1 and its constituent project BBS/E/F/000PR10349.

646

### 647 **Author contributions**

648 EVW – Methodology, validation, investigation, formal analysis, visualisation, writing original draft,  
649 review and editing. LAT – Validation, investigation, formal analysis. JKA – Methodology, validation,  
650 investigation. JW – Conceptualisation, writing - review and editing. GCL – Conceptualisation, data  
651 curation, visualisation, writing original draft, review and editing.

652

## 653 Supplemental Material

654 Supplemental Methods, Supplemental Figures S1-S7 and Supplemental Tables S1-S2

655 Supplemental Table S3: RNAseq

656 Supplemental Table S4: Significant differentially expressed genes

657

## 658 References

- 659 Achaz G, Rocha EPC, Netter P, Coissac E. 2002. Origin and fate of repeats in bacteria. *Nucleic Acids*  
660 *Res* **30**: 2987–2994. doi:10.1093/nar/gkf391.
- 661 Alikhan NF, Petty NK, ben Zakour NL, Beatson SA. 2011. BLAST Ring Image Generator (BRIG): simple  
662 prokaryote genome comparisons. *BMC Genom* **12**: 1–10. doi:10.1186/1471-2164-12-402.
- 663 Arredondo-Alonso S, Pöntinen AK, Cléon F, Gladstone RA, Schürch AC, Johnsen PJ, Samuelson Ø,  
664 Corander J. 2021. A high-throughput multiplexing and selection strategy to complete bacterial  
665 genomes. *Gigascience* **10**: 1–13. doi:10.1093/gigascience/giab079.
- 666 Blom J, Kreis J, Spänig S, Juhre T, Bertelli C, Ernst C, Goesmann A. 2016. EDGAR 2.0: an enhanced  
667 software platform for comparative gene content analyses. *Nucleic Acids Res* **44**: W22–W28.  
668 doi:10.1093/NAR/GKW255.
- 669 Brüssow H, Canchaya C, Hardt W-D. 2004. Phages and the evolution of bacterial pathogens: from  
670 genomic rearrangements to lysogenic conversion. *Microbiol Mol Biol Rev* **68**: 560–602.  
671 doi:10.1128/MMBR.68.3.560-602.2004.
- 672 Carver T, Berriman M, Tivey A, Patel C, Böhme U, Barrell BG, Parkhill J, Rajandream MA. 2008.  
673 Artemis and ACT: viewing, annotating and comparing sequences stored in a relational  
674 database. *Bioinformatics* **24**: 2672–2676. doi:10.1093/bioinformatics/btn529.
- 675 Casino P, Miguel-Romero L, Huesa J, García P, García-del Portillo F, Marina A. 2018. Conformational  
676 dynamism for DNA interaction in the *Salmonella* RcsB response regulator. *Nucleic Acids Res* **46**:  
677 456–472. doi:10.1093/nar/gkx1164.
- 678 Chen S, Zhou Y, Chen Y, Gu J. 2018. fastp: an ultra-fast all-in-one FASTQ preprocessor. *Bioinformatics*  
679 **34**: i884–i890. doi:10.1093/bioinformatics/bty560.
- 680 Darling AE, Mau B, Perna NT. 2010. progressiveMauve: multiple genome alignment with gene gain,  
681 loss and rearrangement. *PLoS One* **5**: e11147. doi:10.1371/journal.pone.0011147.
- 682 Darling AE, Miklós I, Ragan MA. 2008. Dynamics of genome rearrangement in bacterial populations.  
683 *PLoS Genet* **4**: e1000128. doi:10.1371/journal.pgen.1000128.
- 684 Deatherage DE, Barrick JE. 2014. Identification of mutations in laboratory evolved microbes from  
685 next-generation sequencing data using *breseq*. *Methods Mol Biol* **1151**: 165–188.  
686 doi:10.1007/978-1-4939-0554-6\_12.
- 687 Deng W, Liou S-R, Plunkett G, Mayhew GF, Rose DJ, Burland V, Kodoyianni V, Schwartz DC, Blattner  
688 FR. 2003. Comparative genomics of *Salmonella enterica* serovar Typhi strains Ty2 and CT18. *J*  
689 *Bacteriol* **185**: 2330–2337. doi:10.1128/JB.185.7.2330-2337.2003.
- 690 Fitzgerald SF, Lupolova N, Shaaban S, Dallman TJ, Greig D, Allison L, Tongue SC, Evans J, Henry MK,  
691 McNeilly TN, et al. 2021. Genome structural variation in *Escherichia coli* O157:H7. *Microb*  
692 *Genom* **7**: 1–18. doi:10.1099/mgen.0.000682.
- 693 Guan H-H, Yoshimura M, Chuankhayan P, Lin C-C, Chen N-C, Yang M-C, Ismail A, Fun H-K, Chen C-J.  
694 2015. Crystal structure of an antigenic outer-membrane protein from *Salmonella* Typhi  
695 suggests a potential antigenic loop and an efflux mechanism. *Sci Rep* **5**: 1–12.  
696 doi:10.1038/srep16441.

- 697 Guerrero P, Collao B, Álvarez R, Salinas H, Morales EH, Calderón IL, Saavedra CP, Gil F. 2013.  
698 *Salmonella enterica* serovar Typhimurium BaeSR two-component system positively regulates  
699 *sodA* in response to ciprofloxacin. *Microbiology* **159**: 2049–2057. doi:10.1099/mic.0.066787-0.
- 700 Hars U, Horlacher R, Boos W, Welte W, Diederichs K. 1998. Crystal structure of the effector-binding  
701 domain of the trehalose-repressor of *Escherichia coli*, a member of the LacI family, in its  
702 complexes with inducer trehalose-6-phosphate and noninducer trehalose. *Protein Sci* **7**: 2511–  
703 2521. doi:10.1002/pro.5560071204.
- 704 Hughes D. 2000. Evaluating genome dynamics: the constraints on rearrangements within bacterial  
705 genomes. *Genome Biology* **1**: 1–8. doi:10.1186/gb-2000-1-6-reviews0006.
- 706 Kim D, Langmead B, Salzberg SL. 2015. HISAT: a fast spliced aligner with low memory requirements.  
707 *Nature Methods* **12**: 357–360. doi:10.1038/nmeth.3317.
- 708 Kolmogorov M, Yuan J, Lin Y, Pevzner PA. 2019. Assembly of long, error-prone reads using repeat  
709 graphs. *Nat Biotechnol* **37**: 540–546. doi:10.1038/s41587-019-0072-8.
- 710 Koskiniemi S, Sun S, Berg OG, Andersson DI. 2012. Selection-driven gene loss in bacteria. *PLoS Genet*  
711 **8**: e1002787. doi:10.1371/journal.pgen.1002787.
- 712 Kothapalli S, Nair S, Alokam S, Pang T, Khakhria R, Woodward D, Johnson W, Stocker BAD, Sanderson  
713 KE, Liu S-L. 2005. Diversity of genome structure in *Salmonella enterica* serovar Typhi  
714 populations. *J Bacteriol* **187**: 2638–2650. doi:10.1128/JB.187.8.2638-2650.2005.
- 715 Langridge GC, Phan M-D, Turner DJ, Perkins TT, Parts L, Haase J, Charles I, Maskell DJ, Peters SE,  
716 Dougan G, et al. 2009. Simultaneous assay of every *Salmonella Typhi* gene using one million  
717 transposon mutants. *Genome Res* **19**: 2308–2316. doi:10.1101/gr.097097.109.
- 718 Lee H, Doak TG, Popodi E, Foster PL, Tang H. 2016. Insertion sequence-caused large-scale  
719 rearrangements in the genome of *Escherichia coli*. *Nucleic Acids Res* **44**: 7109–7119.  
720 doi:10.1093/nar/gkw647.
- 721 Li H. 2018. Minimap2: pairwise alignment for nucleotide sequences. *Bioinformatics* **34**: 3094–3100.  
722 doi:10.1093/bioinformatics/bty191.
- 723 Liao Y, Smyth GK, Shi W. 2014. featureCounts: an efficient general purpose program for assigning  
724 sequence reads to genomic features. *Bioinformatics* **30**: 923–930.  
725 doi:10.1093/bioinformatics/btt656.
- 726 Liu S-L, Sanderson KE. 1996. Highly plastic chromosomal organization in *Salmonella typhi*. *Proc Natl*  
727 *Acad Sci U S A* **93**: 10303–10308. doi:10.1073/pnas.93.19.10303.
- 728 Liu S-L, Sanderson KE. 1998. Homologous recombination between *rrn* operons rearranges the  
729 chromosome in host-specialized species of *Salmonella*. *FEMS Microbiol Lett* **164**: 275–281.  
730 doi:10.1016/S0378-1097(98)00225-0.
- 731 Love MI, Huber W, Anders S. 2014. Moderated estimation of fold change and dispersion for RNA-seq  
732 data with DESeq2. *Genome Biology* **15**: 1–21. doi:10.1186/s13059-014-0550-8.
- 733 Matthews TD, Rabsch W, Maloy S. 2011. Chromosomal Rearrangements in *Salmonella enterica*  
734 Serovar Typhi Strains Isolated from Asymptomatic Human Carriers. *mBio* **2**: e00060-11.  
735 doi:10.1128/mbio.00060-11.
- 736 Nakagawa I, Kurokawa K, Yamashita A, Nakata M, Tomiyasu Y, Okahashi N, Kawabata S, Yamazaki K,  
737 Shiba T, Yasunaga T, et al. 2003. Genome sequence of an M3 strain of *Streptococcus pyogenes*  
738 reveals a large-scale genomic rearrangement in invasive strains and new insights into phage  
739 evolution. *Genome Res* **13**: 1042–1055. doi:10.1101/gr.1096703.
- 740 Nikaïdo E, Yamaguchi A, Nishino K. 2008. AcrAB multidrug efflux pump regulation in *Salmonella*  
741 *enterica* serovar Typhimurium by RamA in response to environmental signals. *J Biol Chem* **283**:  
742 24245–24253. doi:10.1074/jbc.M804544200.
- 743 Page AJ, Ainsworth EV, Langridge GC. 2020. *socru*: typing of genome-level order and orientation  
744 around ribosomal operons in bacteria. *Microb Genom* **6**: 1–6. doi:10.1099/mgen.0.000396.
- 745 Parkhill J, Dougan G, James KD, Thomson NR, Pickard D, Wain J, Churcher C, Mungall KL, Bentley SD,  
746 Holden MTG, et al. 2001. Complete genome sequence of a multiple drug resistant *Salmonella*  
747 *enterica* serovar Typhi CT18. *Nature* **413**: 848–852. doi:10.1038/35101607.

- 748 Parks DH, Imelfort M, Skennerton CT, Hugenholtz P, Tyson GW. 2015. CheckM: assessing the quality  
749 of microbial genomes recovered from isolates, single cells, and metagenomes. *Genome Res* **25**:  
750 1043–1055. doi:10.1101/gr.186072.114.
- 751 Seemann T. 2014. Prokka: rapid prokaryotic genome annotation. *Bioinformatics* **30**: 2068–2069.  
752 doi:10.1093/bioinformatics/btu153.
- 753 Tacket CO, Sztein MB, Losonsky GA, Wasserman SS, Nataro JP, Edelman R, Pickard D, Dougan G,  
754 Chatfield SN, Levine MM. 1997. Safety of live oral *Salmonella typhi* vaccine strains with  
755 deletions in *htrA* and *aroC aroD* and immune response in humans. *Infect Immun* **65**: 452–456.  
756 doi:10.1128/iai.65.2.452-456.1997.
- 757 Turner AK, Nair S, Wain J. 2006. The acquisition of full fluoroquinolone resistance in *Salmonella*  
758 *Typhi* by accumulation of point mutations in the topoisomerase targets. *J. Antimicrob.*  
759 *Chemother.* **58**: 733–740. doi:10.1093/jac/dkl333.
- 760 Tyson JR, James P, Stoddart D, Sparks N, Wickenhagen A, Hall G, Choi JH, Lapointe H, Kamelian K,  
761 Smith AD, et al. 2020. Improvements to the ARTIC multiplex PCR method for SARS-CoV-2  
762 genome sequencing using nanopore. *bioRxiv*. doi:10.1101/2020.09.04.283077.
- 763 Vanaporn M, Titball RW. 2020. Trehalose and bacterial virulence. *Virulence* **11**: 1192–1202.  
764 doi:10.1080/21505594.2020.1809326.
- 765 Vaser R, Sović I, Nagarajan N, Šikić M. 2017. Fast and accurate de novo genome assembly from long  
766 uncorrected reads. *Genome Res* **27**: 737–746. doi:10.1101/gr.214270.116.
- 767 Virlogeux I, Waxin H, Ecobichon C, Lee JO, Popoff MY. 1996. Characterization of the *rcsA* and *rcsB*  
768 Genes from *Salmonella typhi*: *rcsB* through *tviA* Is Involved in Regulation of Vi Antigen  
769 Synthesis. *J Bacteriol* **178**: 1691–1698. doi:10.1128/jb.178.6.1691-1698.1996.
- 770 Walker BJ, Abeel T, Shea T, Priest M, Abouelliel A, Sakthikumar S, Cuomo CA, Zeng Q, Wortman J,  
771 Young SK, et al. 2014. Pilon: an integrated tool for comprehensive microbial variant detection  
772 and genome assembly improvement. *PLoS One* **9**: e112963. doi:10.1371/journal.pone.0112963.
- 773 Wall E, Majdalani N, Gottesman S. 2018. The complex Rcs regulatory cascade. *Annu Rev Microbiol*  
774 **72**: 111–139. doi:10.1146/annurev-micro-090817-062640.
- 775 Weigand MR, Peng Y, Batra D, Burroughs M, Davis JK, Knipe K, Loparev VN, Johnson T, Juieng P,  
776 Rowe LA, et al. 2019. Conserved patterns of symmetric inversion in the genome evolution of  
777 *Bordetella* respiratory pathogens. *mSystems* **4**: e00702-19. doi:10.1128/msystems.00702-19.
- 778 Weigand MR, Peng Y, Loparev V, Batra D, Bowden KE, Burroughs M, Cassidy PK, Davis JK, Johnson T,  
779 Juieng P, et al. 2017. The history of *Bordetella pertussis* genome evolution includes structural  
780 rearrangement. *J Bacteriol* **199**: e00806-16. doi:10.1128/JB.00806-16.
- 781
